# Supplementary material for: Remotely Sensed Spatiotemporal Variation in Crude Protein of Shortgrass Steppe Forage
Source: MDPI journal article supplement (doi:10.3390/rs14040854), 2022-02-11
Supplement: s1 [file s1]

|            |                | MODIS band | b3   | b4   | b1   | b2   | b5   | b6   | b7   |
|------------|----------------|------------|------|------|------|------|------|------|------|
| MODIS band | Wave band (nm) |            | 470  | 555  | 648  | 858  | 1240 | 1640 | 2130 |
| b3         | 470            |            |      | 0.63 | 0.04 | 0.66 | 0.61 | 0.39 | 0.12 |
| b4         | 555            |            | 0.63 |      | 0.65 | 0.61 | 0.40 | 0.01 | 0.12 |
| b1         | 648            |            | 0.04 | 0.65 |      | 0.66 | 0.62 | 0.38 | 0.09 |
| b2         | 858            |            | 0.66 | 0.61 | 0.66 |      | 0.25 | 0.45 | 0.42 |
| b5         | 1240           |            | 0.61 | 0.40 | 0.62 | 0.25 |      | 0.42 | 0.44 |
| b6         | 1640           |            | 0.39 | 0.01 | 0.38 | 0.45 | 0.42 |      | 0.25 |
| b7         | 2130           |            | 0.12 | 0.12 | 0.09 | 0.42 | 0.44 | 0.25 |      |
